# Supplementary material
Source: PubMed Central journal article supplement (PMC9538850)
Supplement: JMV-9999-0-s002.pdf [file JMV-9999-0-s002.pdf]

## **Supplementary figure legends**

**Figure S1.** A PRISMA flow diagram of the search methods on the Delta variant

**Figure S2.** Influential analysis of the proportion of asymptomatic infection in COVID-19 Omicron patients

**Figure S3.** Funnel plot based on the proportion of asymptomatic infection in COVID-19 Omicron patients for evaluation of publication bias

**Figure S4.** Begg's test based on the proportion of asymptomatic infection in COVID-19 Omicron patients for evaluation of publication bias

**Figure S5.** Influential analysis of the proportion of non-severe disease in COVID-19 Omicron patients

**Figure S6.** Subgroup analysis of the proportion of non-severe disease by whether estimated with hospitalization

**Figure S7.** Funnel plot based on the proportion of non-severe disease in COVID-19 Omicron patients for evaluation of publication bias

**Figure S8.** Begg's test based on the proportion of non-severe disease in COVID-19 Omicron patients for evaluation of publication bias

**Figure S9.** Forest plot of the proportion of asymptomatic infection in COVID-19 Delta patients

**Figure S10.** Forest plot of the proportion of non-severe disease in COVID-19 Delta patients

**Figure S11.** Influential analysis of the proportion of asymptomatic infection in COVID-19 Delta patients

**Figure S12.** Influential analysis of the proportion of non-severe disease in COVID-19 Delta patients

**Figure S13.** Funnel plot based on the proportion of asymptomatic infection in COVID-19 Delta patients for evaluation of publication bias

**Figure S14.** Funnel plot based on the proportion of non-severe disease in COVID-19 Delta patients for evaluation of publication bias

**Figure S15.** Clinical severity of COVID-19 was decreased during the Omicron wave compared to the Delta wave, especially among individuals with boosted vaccination. (A) Patients infected with SARS-CoV-2 Delta variant (B) Patients infected with SARS-CoV-2 Omicron variant (C) Patients infected with Omicron with boosted vaccination. Data of Non-severe COVID-19 (Symptomatic infection) and Severe and critical COVID-19 are merely calculated according to the results of meta-analysis on proportion of asymptomatic infection and non-severe COVID-19 instead of real statistic results.

Figure S1

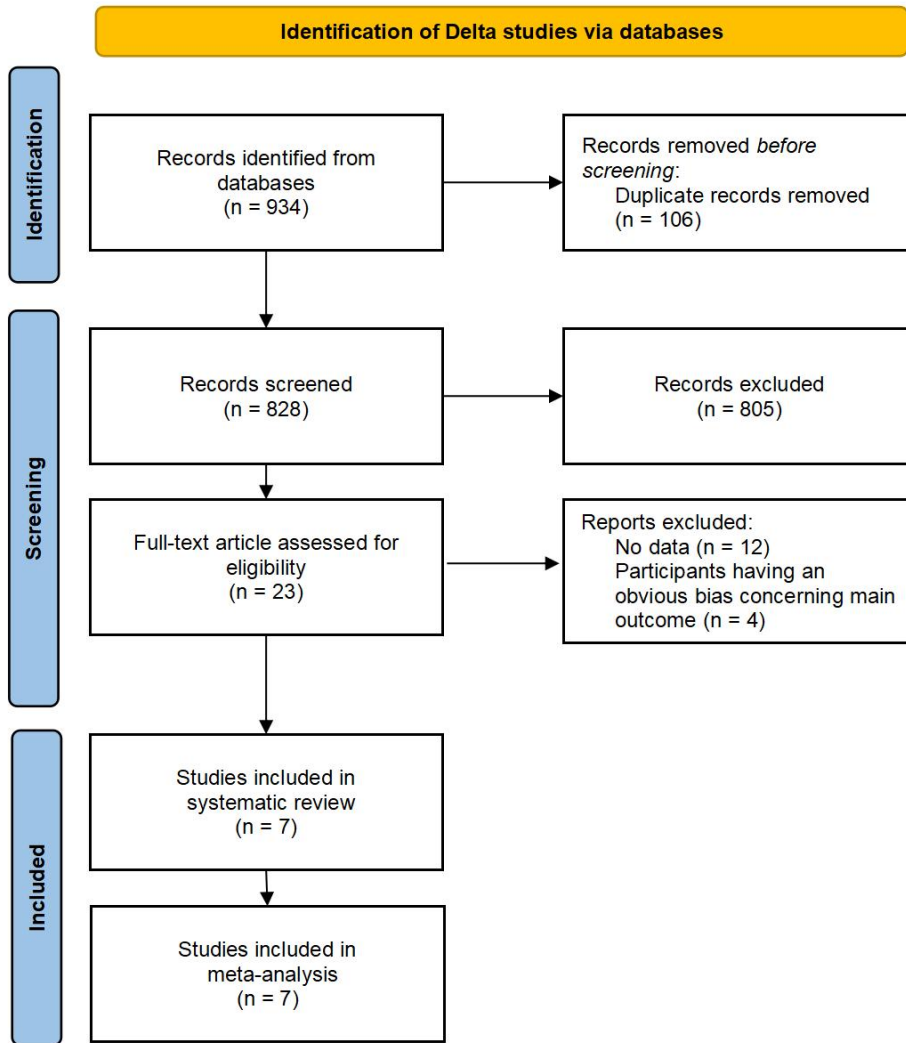

Figure S2

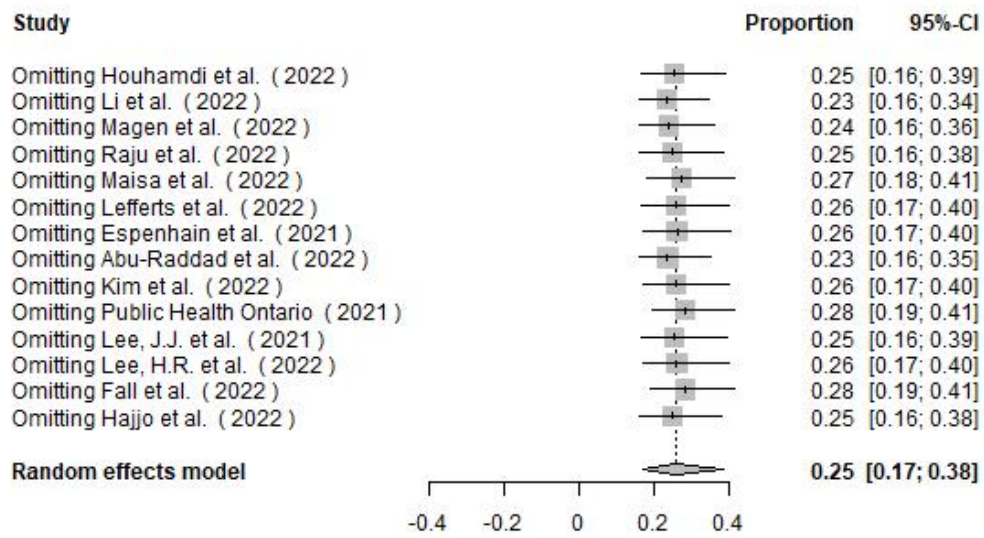

Figure S3

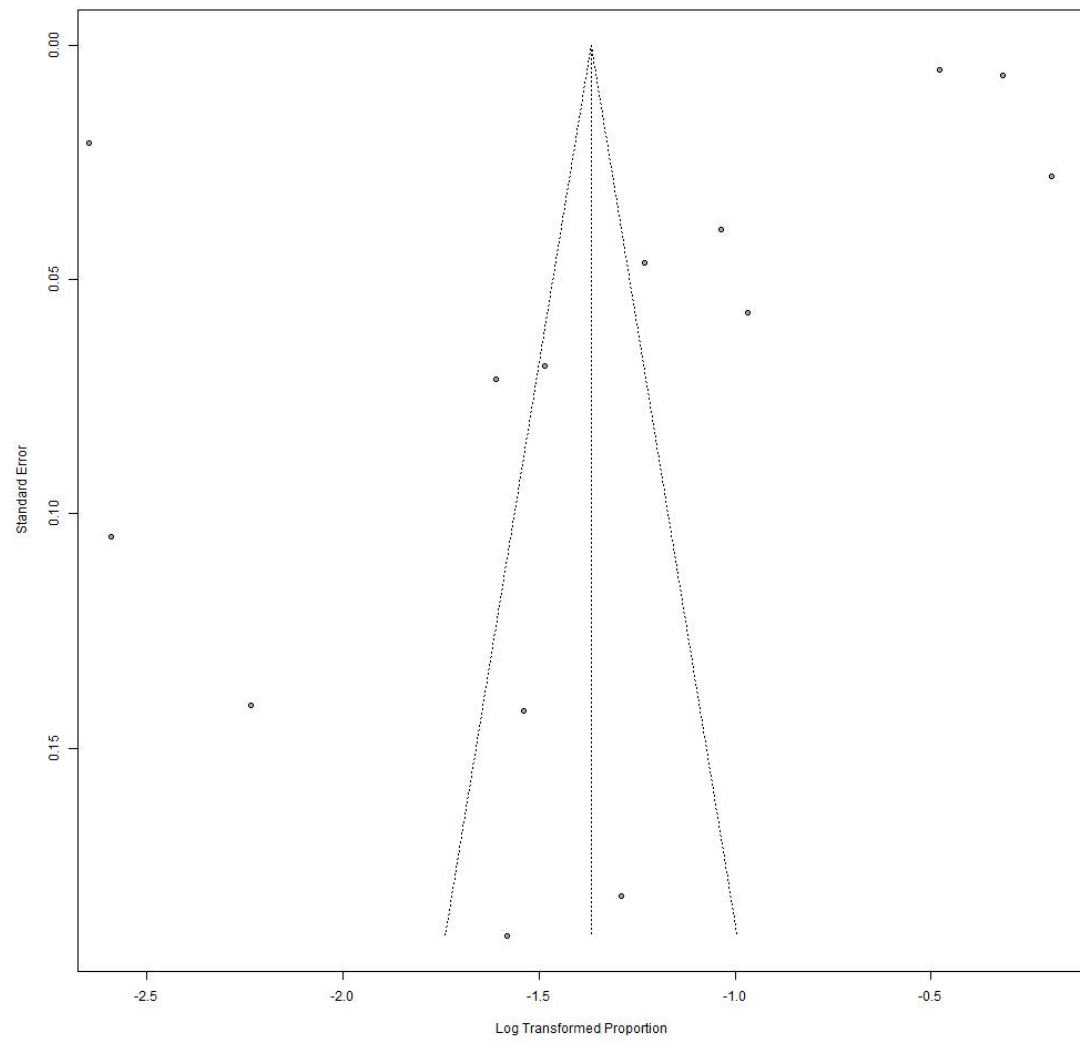

Figure S4

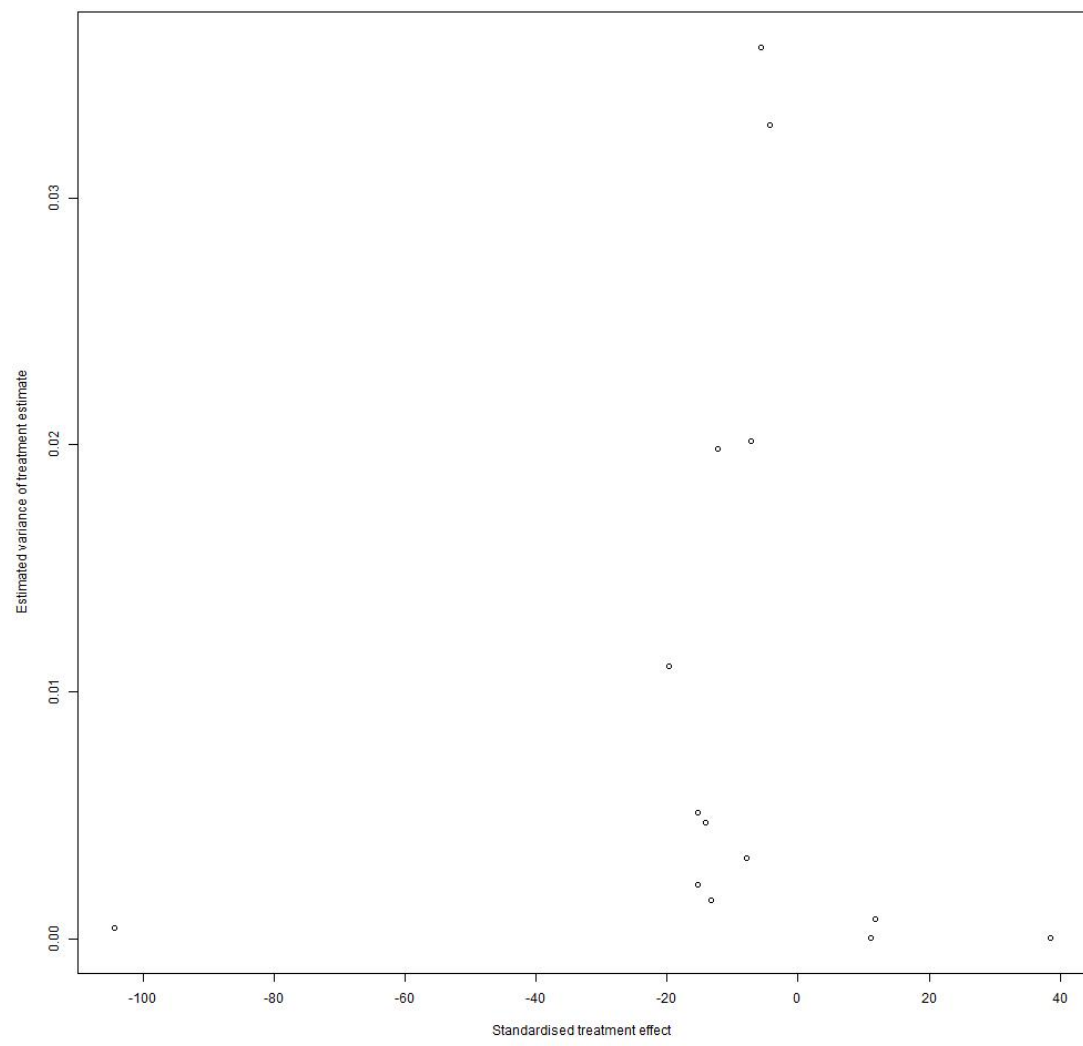

Figure S5

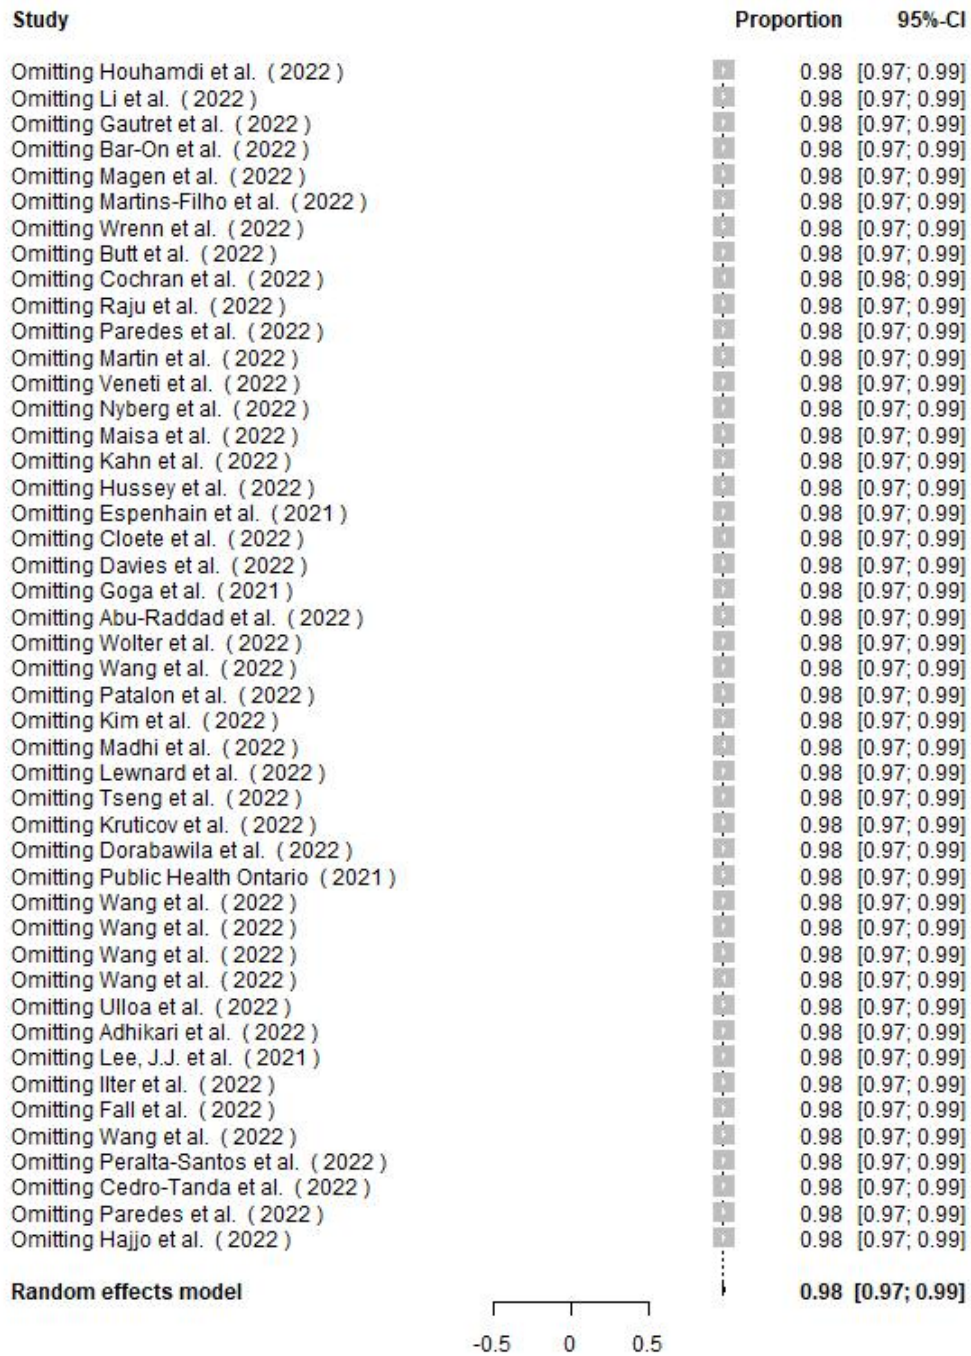

Figure S6

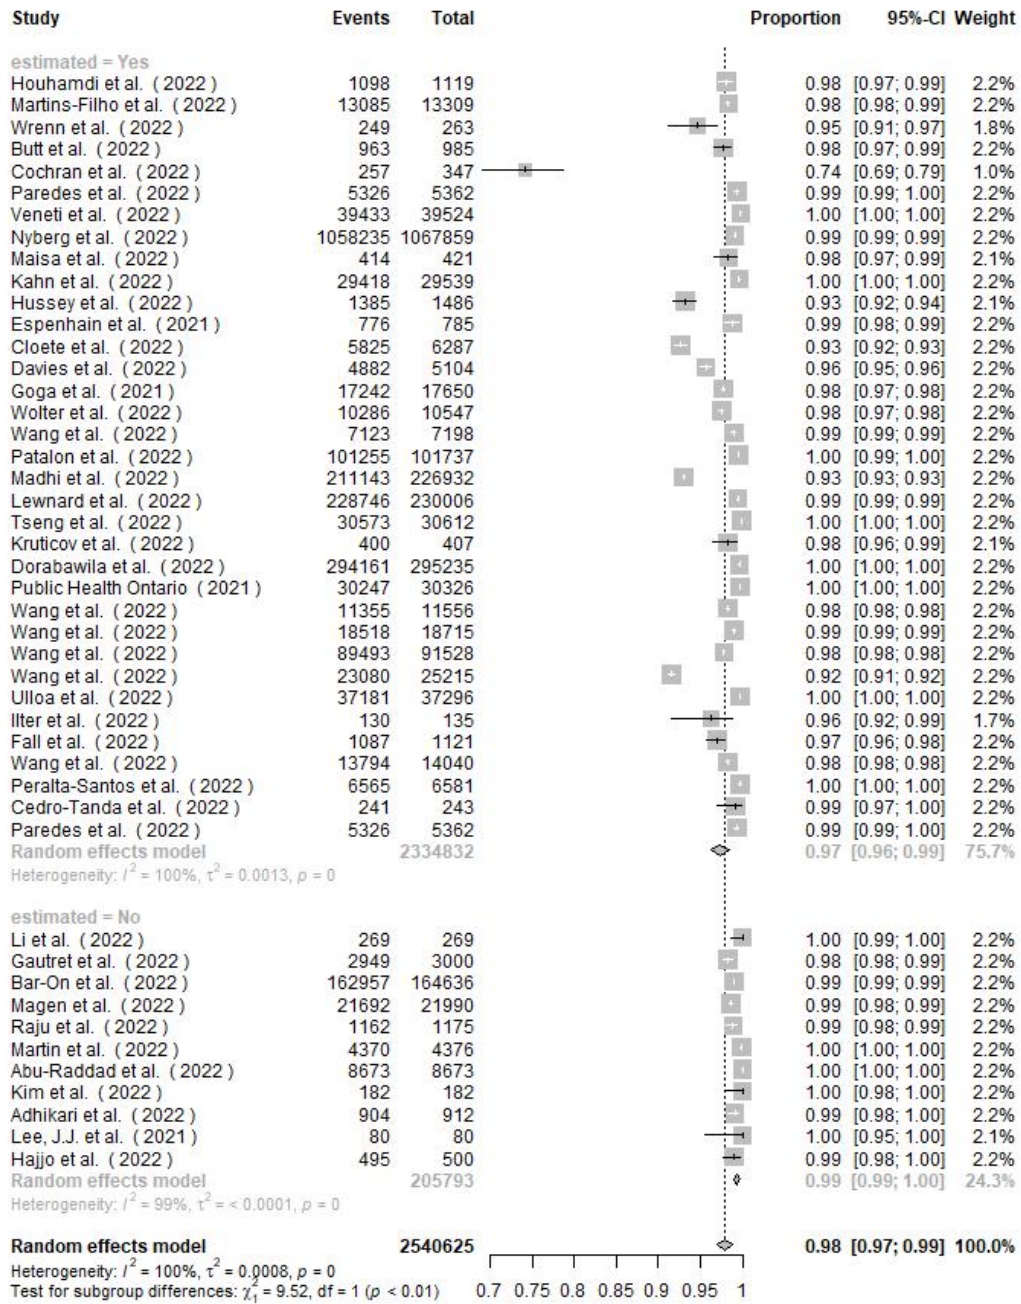

Figure S7

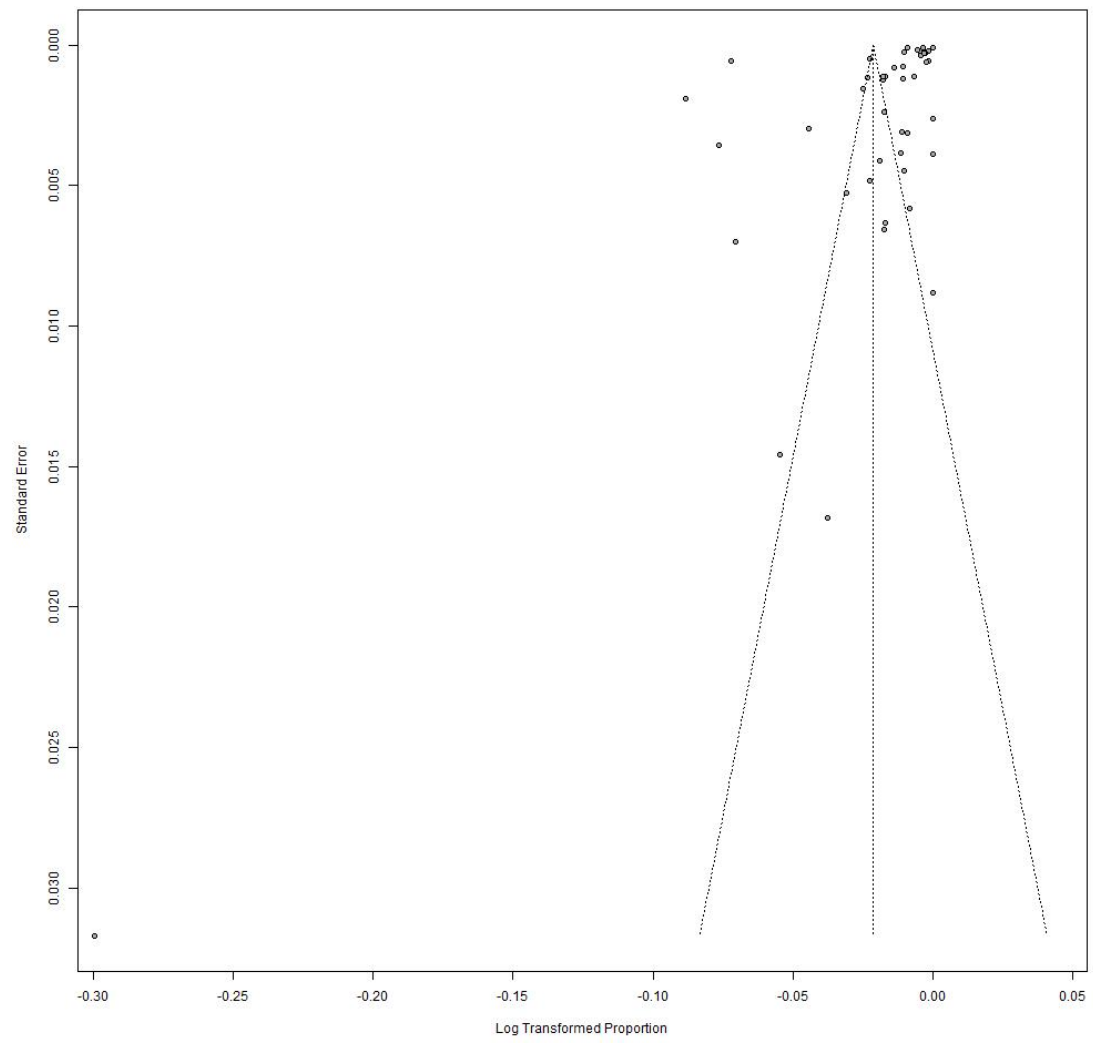



Figure S8

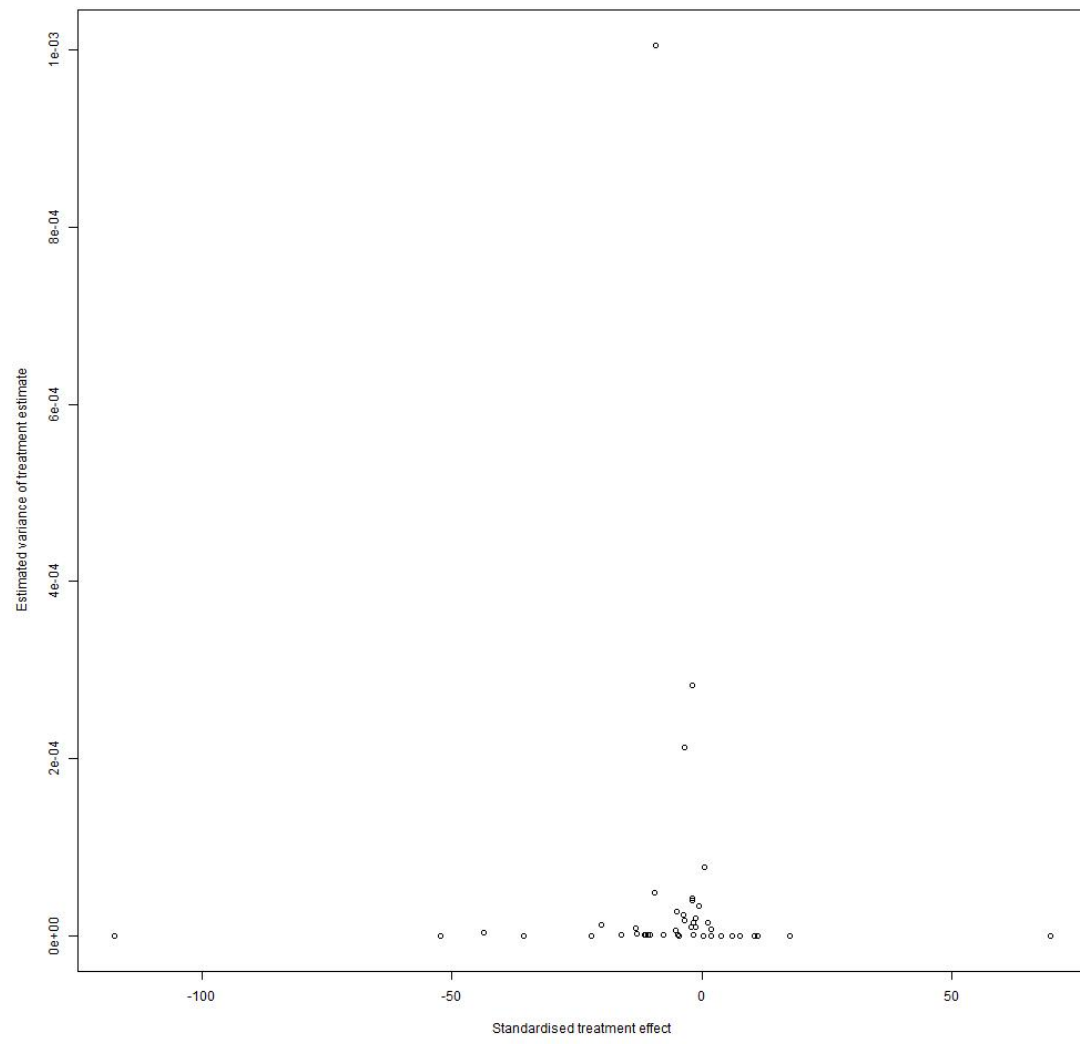

Figure S9

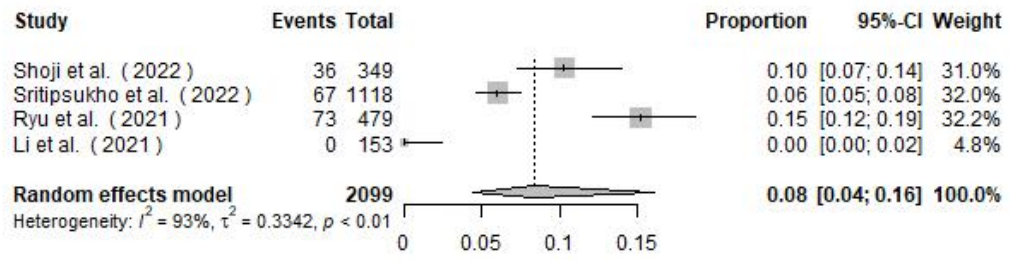

Figure S10

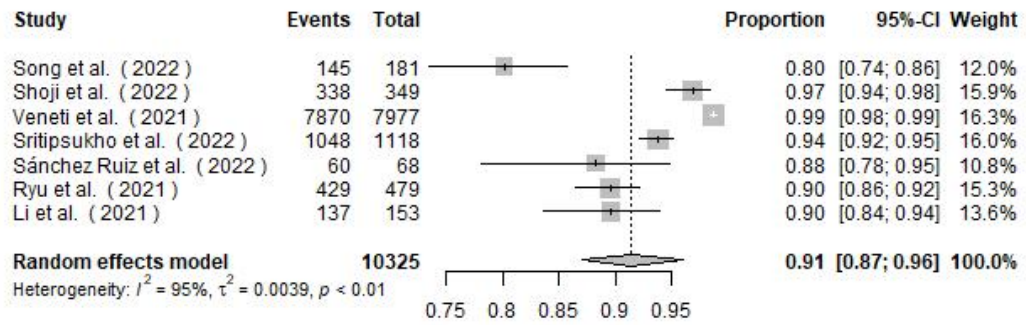

Figure S11

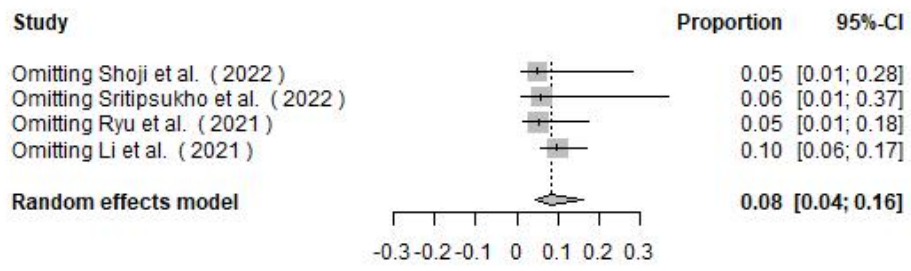

Figure S12

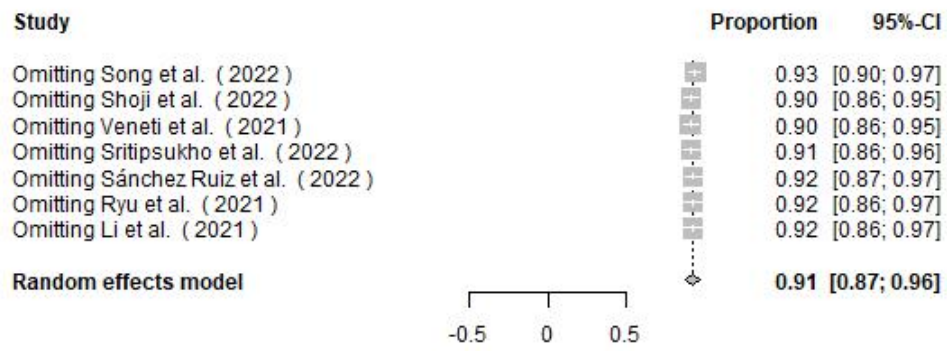

Figure S13

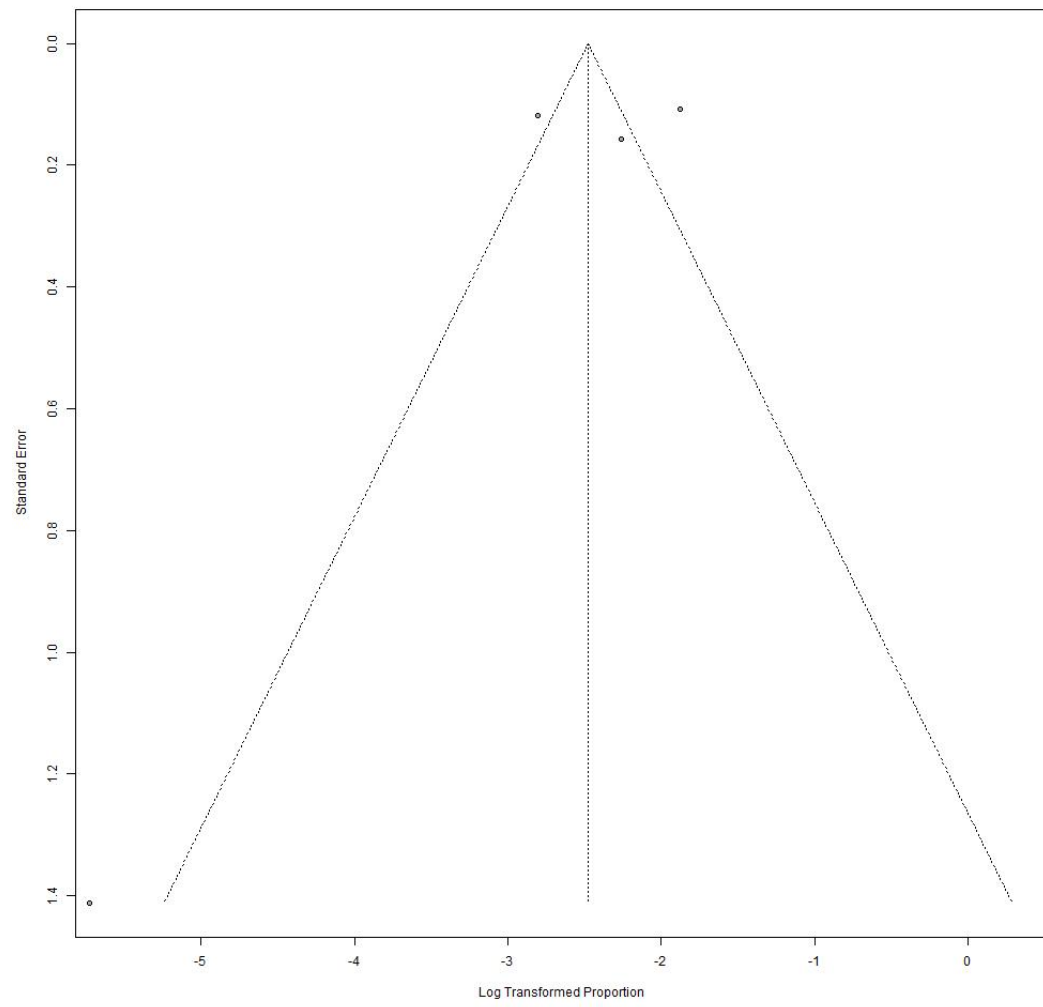

Figure S14

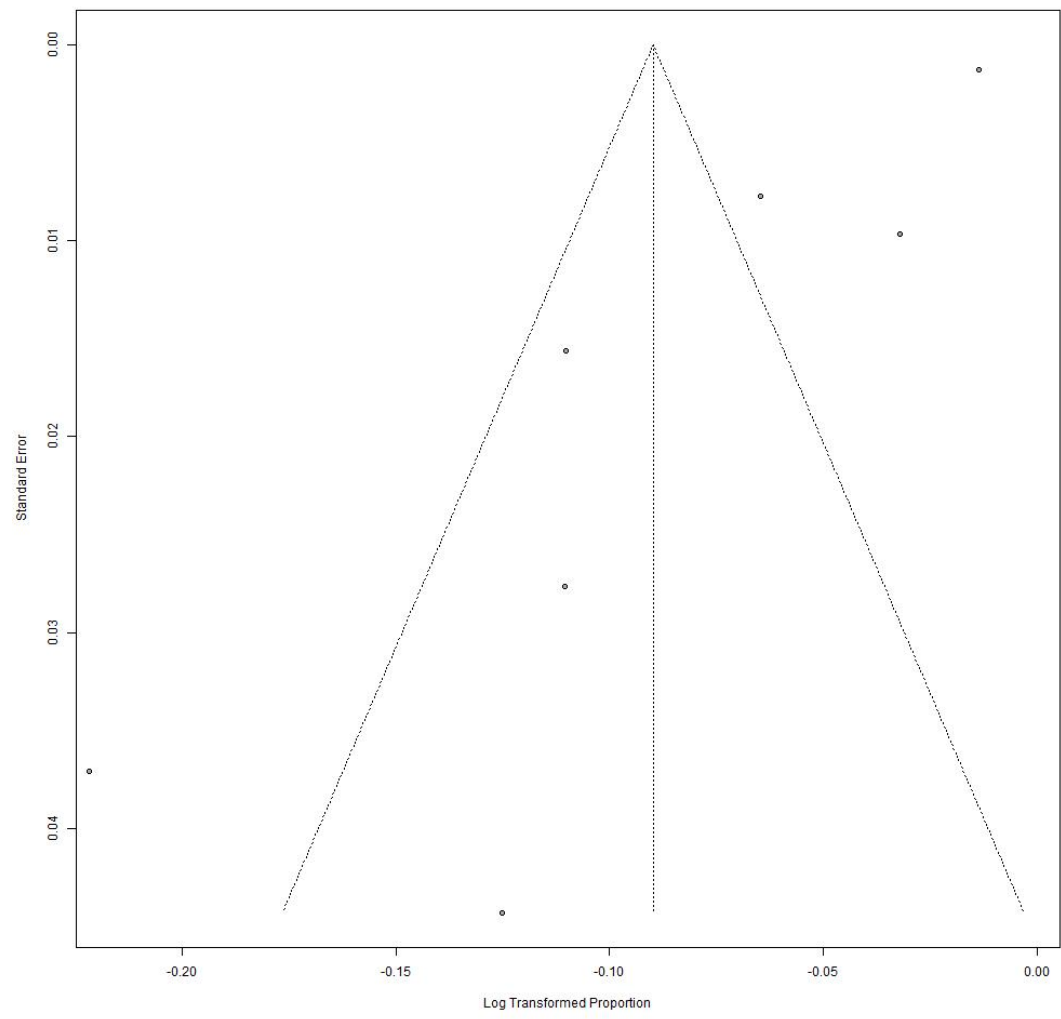

Figure S15

(A)

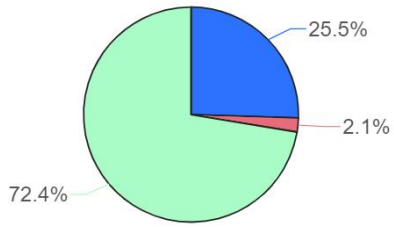

- Non-severe COVID-19 (Asymptomatic infection)
- Non-severe COVID-19 (Symptomatic infection)
- Severe and critical COVID-19

(B)

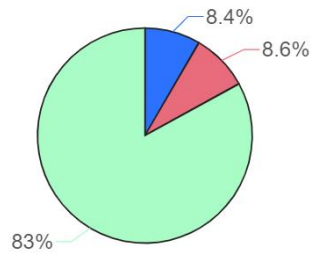

- Non-severe COVID-19 (Asymptomatic infection)
- Non-severe COVID-19 (Symptomatic infection)
- Severe and critical COVID-19

(C)

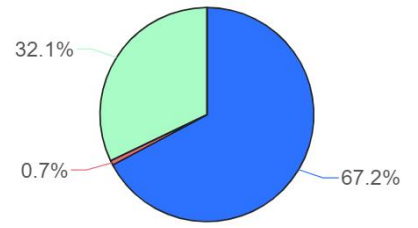

- Non-severe COVID-19 (Asymptomatic infection)
- Non-severe COVID-19 (Symptomatic infection)
- Severe and critical COVID-19
